# Supplementary material
Source: MDPI journal article supplement (https://www.mdpi.com/2077-0472/12/11/1856)
Supplement: s1 [file s1]

Table S1. The list of primers used for the expression analysis

| Primer name | Sequence (5' - 3')           |
|-------------|------------------------------|
| PeNHX1-F    | GCGATTCTTCCGCAACTTTATC       |
| PeNHX1-R    | GAATTCAATAGCACCTAATGATATGACA |
| PeNHX2-F    | CAGTTTACAAGGTCAGGACATACTCA   |
| PeNHX2-R    | AAGGACAACAGTTATGGTGCTG       |
| PeSOS1-F    | TAGGGGACAGCGATATTCCT         |
| PeSOS1-R    | ACCTGAGGAAATGTAATACGAACA     |
| PeSOS2-F    | CAGGGTCCACTATGCAAGAAA        |
| PeSOS2-R    | TCCATCATCCCAACCTTCAAC        |
| PeSOS3-F    | TGAATGAAGTAGAGGCCTTATATGAAC  |
| PeSOS3-R    | AGCTGCAGTTCTTCCTTGTG         |
| PeHKTI-F    | AGAACAAGGGACTAAACACTATAAC    |
| PeHKTI-R    | GGAGGCCTGAGTTCTTTCTA         |
| PeAKTI-F    | TTGCAGAGTATGGGAGACTTTT       |
| PeAKTI-R    | CGCAAGCGCTGTGTTTC            |
| PeNPF2.4-F  | GGCATCGGAGAGGCATTT           |
| PeNPF2.4-R  | CTGTGCTCTTAAGTGAGTCTGG       |
| PeSLAH1-F   | TTTGCACCACATAGGAGTAAACTA     |
| PeSLAH1-R   | TGCAATGAAGAACGAGATAGGG       |
| PeSLAH3-F   | CTCTCTGGCAGTTCGTGTC          |
| PeSLAH3-R   | TCGAGTATCTGATGGTTGCTATG      |
| PeCCC-F     | CTGGATTTCTGATAGAGAGCAGAC     |
| PeCCC-R     | GAGACCCTAATGTGAGCAGAAG       |
| PeALMT9-F   | AGGAGCAACTCTTAGCAAAGG        |
| PeALMT9-R   | ATGACGATTTCTTCCCACTCTC       |
| PeALMT12-F  | GTTCACTGCAGGAGCAACT          |
| PeALMT12-R  | GCAATGACCTGAACGATGAATG       |
| PeCLC-C-F   | CGAAGGAGGTCTGATCATGTTT       |
| PeCLC-C-R   | ACTCCAAGGATTATAACTGCCAA      |
| PeCLC-G-F   | ACAGTGGCTGATGCTTTCA          |
| PeCLC-G-R   | TCAGCATGGGTTTCTAGATAAGG      |
| PeHistone-F | AGTCCCCAAACGCCTAAGC          |
| PeHistone-R | GAAACCACCAGTCTTATGTG         |
| Pe60S-F     | AGGTGGGTAACAGGATTATC         |
| Pe60S-R     | TGGCTGTCTTTTGGTGCTG          |
| PeTIF-F     | CCAATCCACGCTCAAGACC          |
| PeTIF-R     | TTTATGTGCTGAAGCCTCTC         |

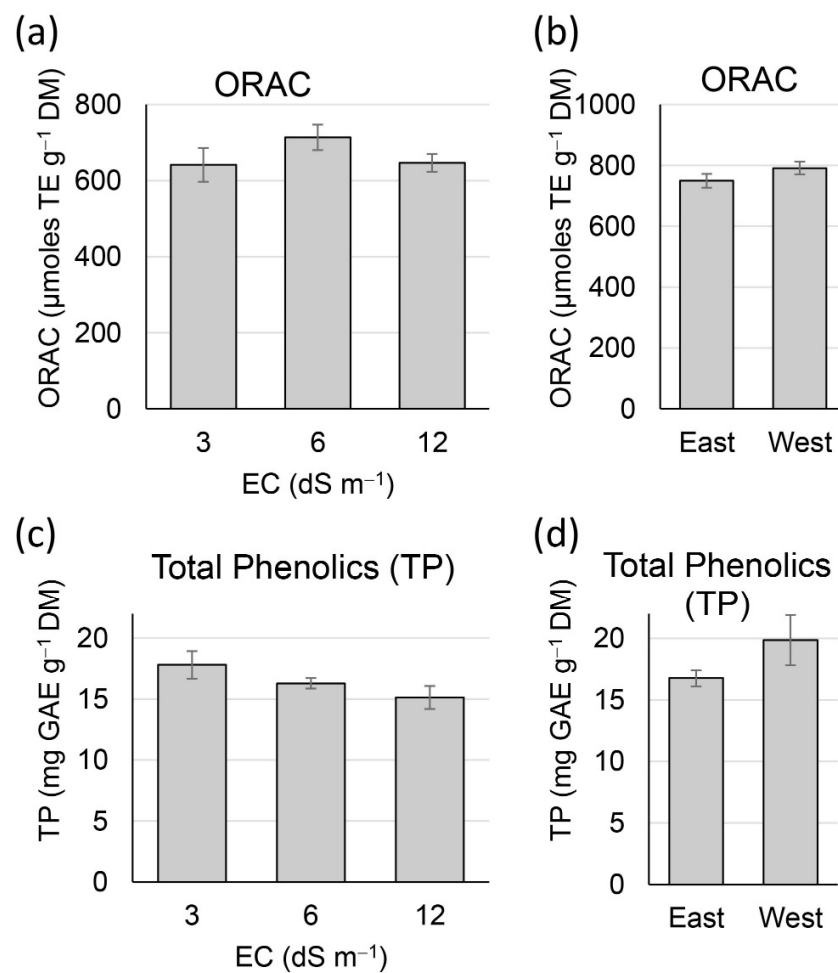

**Figure S1.** Leaf hydrophilic oxygen radical absorbance capacity (ORAC) and total phenolics (TP) concentration of passion fruit grown under three salinities or leaves sampled from the east and west side. a) Leaf ORAC at different salinities. b) Leaf ORAC for the samples taken from the east and west sides. c) Leaf TP at different salinities. d) Leaf TP for the samples taken from the east and west sides. Error bars represent standard errors.
